# Supplementary material for: MRI Patterns Distinguish AQP4 Antibody Positive Neuromyelitis Optica Spectrum Disorder From Multiple Sclerosis
Source: PubMed Central journal article supplement (PMC8458658; doi:10.3389/fneur.2021.722237), 2021-09-09
Supplement: Table_1.pdf [file Table_1.pdf]

**Supplementary Table 1. Results of literature search**

| <b>Author/Year (Ref)</b>      | <b>Found</b> | <b>Population</b>         | <b>Study Type</b> | <b>Lesions Identified</b>                                                                                                                           |
|-------------------------------|--------------|---------------------------|-------------------|-----------------------------------------------------------------------------------------------------------------------------------------------------|
| Misu et al 2005 (37)          | LS           | NMOSD                     | Case series       | Nucleus tractus solitarius in NMOSD                                                                                                                 |
| Nakashima et al 2006 (38)     | LS           | OSMS (AQP4 +ve vs -ve)    | Case series       | LESCL in NMOSD                                                                                                                                      |
| Chan et al 2006 (39)          | LS           | ATM (NMOSD vs MS vs IDDD) | Case series       | LESCL in NMOSD                                                                                                                                      |
| Pittock et al 2006 (40)       | LS           | NMOSD                     | Case series       | Brain abnormalities in NMOSD                                                                                                                        |
| Pittock et al 2006 (41)       | LS           | NMOSD                     | Case series       | III ventricle; IV ventricle; hypothalamus; periaqueductal; central medulla; optic chiasm; superior cerebellar peduncle; subpial cerebellar in NMOSD |
| Scott et al 2006 (42)         | LS           | NMOSD vs MS               | Comparison        | Short cord; partial cord in MS                                                                                                                      |
| Cabrera-Gomez et al 2007 (43) | LS           | NMOSD                     | Case series       | Gd-enhancing ON in NMOSD                                                                                                                            |
| Bichuetti et al 2008 (44)     | LS           | NMOSD                     | Case series       | Brain abnormalities in NMOSD                                                                                                                        |
| Cabrera-Gomez et al 2008 (45) | LS           | NMOSD                     | Case series       | Linear corpus callosum; linear periventricular; tumefactive; bridging splenium in NMOSD                                                             |
| Li et al 2008 (46)            | LS           | NMOSD                     | Case series       | Punctate; patch; medulla in NMOSD                                                                                                                   |
| Nakamura et al 2008 (47)      | LS           | NMOSD                     | Case series       | Central cord in NMOSD                                                                                                                               |
| Cassinotto et al 2009 (48)    | LS           | NMOSD                     | Case series       | LESCL; central cord; Gd-enhancing cord; ring-enhancing cord; cord swelling in NMOSD                                                                 |
| Ito et al 2009 (49)           | LS           | NMOSD                     | Case series       | Cloud-like enhancement in NMOSD                                                                                                                     |
| Krampla et al 2009 (50)       | LS           | NMOSD                     | Case series       | Central cord in NMOSD                                                                                                                               |
| Magana et al 2009 (51)        | LS           | NMOSD                     | Case series       | PRES in NMOSD                                                                                                                                       |
| Nakamura et al 2009 (52)      | LS           | NMOSD vs MS               | Comparison        | Large heterogeneous corpus callosum in NMOSD                                                                                                        |
| Adoni et al 2010 (53)         | LS           | NMOSD                     | Case series       | Whole (axial) cord; cervical and thoracic cord in NMOSD                                                                                             |
| Lu et al 2010 (54)            | LS           | NMOSD vs MS               | Comparison        | LESCL; central cord; linear cord; linear medulla in NMOSD                                                                                           |
| Matsushita et al 2010 (55)    | LS           | NMOSD vs MS               | Comparison        | Tumefactive in NMOSD; ovoid in MS                                                                                                                   |

|                              |    |                             |             |                                                                                                                                            |
|------------------------------|----|-----------------------------|-------------|--------------------------------------------------------------------------------------------------------------------------------------------|
| Chan et al 2011 (56)         | LS | NMOSD                       | Case series | Periaqueductal; IV ventricle; central medulla; tumefactive; cloud-like in NMOSD                                                            |
| Ikeda et al 2011 (57)        | LS | NMOSD                       | Case report | Tumefactive in NMOSD                                                                                                                       |
| Kim et al 2011 (58)          | LS | NMOSD                       | Case series | Brain abnormalities in NMOSD                                                                                                               |
| Li et al 2011 (59)           | LS | ATM (AQP4 +ve vs -ve)       | Case series | LESCL; central cord in NMOSD                                                                                                               |
| Liu et al 2011 (60)          | LS | NMOSD vs MS                 | Comparison  | McDonald MRI criteria in MS                                                                                                                |
| Lu et al 2011 (61)           | LS | NMOSD vs MS vs ADEM         | Comparison  | Medulla; dorsal brainstem in NMSOD                                                                                                         |
| Qiu et al 2011 (62)          | LS | MS                          | Case series | Hypothalamic in MS                                                                                                                         |
| Wang et al 2011 (63)         | LS | NMOSD                       | Case series | LESCL in NMOSD                                                                                                                             |
| Wang et al 2011 (64)         | LS | NMOSD                       | Case series | Hypothalamic in NMOSD                                                                                                                      |
| Chen et al 2012 (65)         | LS | NMOSD vs MS                 | Comparative | Periependymal 'dot' corpus callosum in NMOSD                                                                                               |
| Downer et al 2012 (16)       | LS | NMOSD (AQP4 +ve vs -ve)     | Case series | LESCL; central cord; cord T1 hypointensity; hypothalamic; periaqueductal in NMOSD                                                          |
| Khanna et al 2012 (66)       | LS | NMOSD vs MS                 | Comparative | Optic chiasm in NMOSD                                                                                                                      |
| Lalan et al 2012 (67)        | LS | NMOSD vs MS                 | Comparative | LESCL; central cord in NMOSD: short cord; peripheral cord in MS                                                                            |
| Pires et al 2012 (68)        | LS | NMOSD                       | Case series | Non-specific; patches; punctate; linear periventricular ependymal; IV ventricle in NMOSD                                                   |
| Zhong et al 2012 (69)        | LS | NMOSD vs MS                 | Comparative | Central cord in NMOSD                                                                                                                      |
| Asgari et al 2013 (70)       | LS | LETM (AQP4 +ve vs -ve)      | Case series | Brainstem; hypothalamic; periaqueductal; central medullary and area postrema in NMSOD                                                      |
| Chan et al 2013 (71)         | LS | NMOSD vs MS vs ADEM vs IDDD | Comparison  | LESCL; normal brain in NMOSD                                                                                                               |
| Iorio et al 2013 (72)        | LS | LETM (AQP4 +ve vs -ve)      | Case series | Central medulla; central cord in NMOSD                                                                                                     |
| Kiyat-Atamer et al 2013 (73) | LS | NMOSD (AQP4 +ve vs -ve)     | Case series | LESCL in NMSOD                                                                                                                             |
| Makino et al 2013 (74)       | LS | NMOSD vs MS                 | Comparative | Heterogenous splenium; bridging splenium in NMOSD                                                                                          |
| Matthews et al 2013 (14)     | LS | NMOSD vs MS                 | Comparative | Periventricular; inferior temporal; juxtacortical; Dawson's fingers in MS: Tumefactive; thalamic; cerebral peduncle; IV ventricle in NMOSD |

|                          |    |                        |                     |                                                                                                                                                                      |
|--------------------------|----|------------------------|---------------------|----------------------------------------------------------------------------------------------------------------------------------------------------------------------|
| Barhate et al 2014 (75)  | LS | NMOSD                  | Case series         | LESCL; central medulla in NMOSD                                                                                                                                      |
| Berger et al 2014 (76)   | LS | NMOSD                  | Case report         | PRES in NMOSD                                                                                                                                                        |
| Huh et al 2014 (77)      | LS | NMOSD vs MS            | Comparison          | Ovoid; juxtacortical; perpendicular periventricular in MS: Longitudinal CST; tumefactive; linear periventricular periependymal; central medullar in NMOSD            |
| Kim et al 2014 (78)      | LS | NMOSD                  | Case series         | Cystic in NMOSD                                                                                                                                                      |
| Kulkarni et al 2014 (79) | LS | NMOSD                  | Case report         | Area postrema in NMOSD                                                                                                                                               |
| Liao et al 2014 (18)     | LS | NMOSD vs MS            | Comparison          | Pyramidal corpus callosum; brainstem ependymal dot in MS: Punctate; linear ependymal in NMOSD                                                                        |
| Lim et al 2014 (80)      | LS | ON (NMOSD vs MS)       | Comparison          | Chiasm in NMOSD                                                                                                                                                      |
| Lin et al 2014 (81)      | LS | NMOSD                  | Case series         | LESCL; cervical and thoracic cord in NMOSD                                                                                                                           |
| Liu et al 2014 (82)      | LS | NMOSD vs MS            | Comparison          | LESCL in NMOSD: brainstem in MS                                                                                                                                      |
| Long et al 2014 (83)     | LS | NMOSD vs MS            | Comparison          | 'Cloud-like'; 'pencil thin' periependymal; periventricular enhancement; IV ventricle enhancement; leptomenigeal enhancement in NMOSD: white matter enhancement in MS |
| Yonezu et al 2014 (84)   | LS | NMOSD vs MS            | Comparison          | 'Bright spotty' cord in NMOSD                                                                                                                                        |
| Zhang et al 2014 (85)    | LS | NMOSD vs MS vs ADEM    | Comparison          | Hypothalamus in NMOSD: Thalamus equivalent in NMOSD and MS                                                                                                           |
| Absoud et al 2015 (86)   | LS | Paediatric NMOSD       | Case series         | Abnormal brain in NMOSD                                                                                                                                              |
| Eshaghi et al 2015 (87)  | LS | NMOSD vs MS vs Healthy | Comparison          | T2 lesion volume in MS                                                                                                                                               |
| Flanagan et al 2015 (88) | LS | TM (AQP4 +ve vs -ve)   | Comparison          | Central cord; T1 hypointense cord; LESCL in NMOSD; Barkhof criteria in MS                                                                                            |
| Igel et al 2015 (89)     | LS | NMOSD                  | Case report         | PRES in NMOSD                                                                                                                                                        |
| Lemos et al 2015 (90)    | LS | NMOSD                  | Case series         | LESCL; abnormal brain in NMOSD                                                                                                                                       |
| Mealy et al 2015 (91)    | LS | NMOSD vs MS            | Comparison          | Long ON in NMOSD                                                                                                                                                     |
| Wingerchuk 2015 (1)      | LS | NMOSD                  | Diagnostic Criteria | Normal MRI brain; long ON lesion; optic chiasm; LESCL; area postrema; periependymal brainstem in NMOSD                                                               |
| Yokote et al 2015 (92)   | LS | NMOSD                  | Case series         | Ring-enhancing cord in NMOSD                                                                                                                                         |

|                                      |    |                          |             |                                                                                                                                                        |
|--------------------------------------|----|--------------------------|-------------|--------------------------------------------------------------------------------------------------------------------------------------------------------|
| Kim et al 2016 (93)                  | LS | NMOSD                    | Case series | Heterogeneous corpus callosum; longitudinal CST; cerebral peduncle; IV ventricle; tumefactive; linear periventricular ependymal; hypothalamic in NMOSD |
| Kim et al 2016 (94)                  | LS | NMOSD                    | Case series | Leptomeningeal enhancement in NMSOD                                                                                                                    |
| Kister et al 2016 (95)               | LS | TM (NMOSD vs MS)         | Comparison  | High cervical cord; extension to pial surface cord; 'bright spotty' cord; enhancing cord in NMOSD                                                      |
| Flanagan et al 2016 (96)             | LS | NMOSD vs Sarcoid         | Comparison  | Ring-enhancement of cord in NMOSD                                                                                                                      |
| Pekcevik et al 2016 (97)             | LS | LETM                     | Case series | 'Bright spotty' cord; central cord; whole (axial) cord in NMOSD                                                                                        |
| Abdullah et al 2017 (98)             | LS | AQP4 +ve vs IDDD         | Comparison  | Fewer lesions in NMOSD: McDonald MRI criteria in IDDD                                                                                                  |
| Buch et al 2017 (99)                 | LS | ON (NMOSD vs MS)         | Comparison  | Long ON; bilateral ON; chiasm in MMOSD: McDonald criteria in MS                                                                                        |
| Dumrikarnlert et al 2017 (100)       | LS | TM (NMOSD vs MS vs IDDD) | Comparison  | Cervical cord; partial cord in MS: LESCL; central; cervico-thoracic in NMOSD                                                                           |
| Hayashida et al 2017 (101)           | LS | NMOSD                    | Case series | Central cord, whole cord in NMOSD                                                                                                                      |
| Huh et al 2017 (102)                 | LS | NMOSD (AQP4 +ve)         | Case series | Short cord in NMOSD                                                                                                                                    |
| Jurynczyk et al 2017 (32)            | LS | NMOSD vs MS vs MARD      | Comparison  | Matthews criteria in MS                                                                                                                                |
| Zalewski et al 2017 (103)            | LS | NMOSD vs MS              | Comparison  | Ring-enhancing cord in NMOSD                                                                                                                           |
| Bensi et al 2018 (33)                | LS | NMOSD vs MOGAD vs MS     | Comparison  | Periventricular, inferior temporal lobe, juxtacortical, Dawson finger, short segment spinal cord lesion in MS                                          |
| Carnero Contentti et al 2018 (104)   | LS | NMOSD                    | Case series | Optic chiasm, corticospinal tract, third ventricle, thalamus, hypothalamus, area postrema in NMSOD                                                     |
| Chee et al 2018 (105)                | LS | NMSOD                    | Case series | Central medullary, cord swelling, bright spotty, central cord in NMSOD                                                                                 |
| Hu et al 2018 (106)                  | LS | NMOSD                    | Case series | LESCL in NMOSD                                                                                                                                         |
| Lu et al 2018 (107)                  | LS | NMOSD vs MS              | Comparison  | Optic chiasm in NMOSD                                                                                                                                  |
| Mehdipour-Dastjerdi et al 2018 (108) | LS | NMOSD                    | Case series | Thalamic, hypothalamic, III ventricle, IV ventricle, area postrema, linear periependymal periventricular, LESCL, short segment spinal cord in NMOSD    |
| Tatekawa et al 2018 (109)            | LS | NMOSD vs MS              | Comparison  | Spinal cord atrophy, spinal cord swelling, central cord in NMOSD; ovoid, T1 black hole, callosal-septal-interface, juxtacortical in MS                 |
| Hyun et al 2019 (34)                 | LS | NMOSD vs MOGAD vs MS     | Comparison  | Periventricular, inferior temporal lobe, juxtacortical, Dawson finger in MS                                                                            |

|                           |     |                        |                     |                                                                                                                                                     |
|---------------------------|-----|------------------------|---------------------|-----------------------------------------------------------------------------------------------------------------------------------------------------|
| Kim et al 2010 (17)       | B/P | NMOSD                  | Case series         | Longitudinal CST; tumefactive; III ventricle; IV ventricle; linear periventricular ependymal; central medullary; non-specific brain; LESCL in NMOSD |
| Matsuoka et al 2010 (110) | B/P | NMOSD                  | Case report         | Balo's in NMOSD                                                                                                                                     |
| Banker et al 2012 (111)   | B/P | NMOSD                  | Case series         | Ependymal Gd; linear periventricular ependymal in NMOSD                                                                                             |
| Pula et al 2014 (112)     | B/P | NMOSD vs MS vs Sarcoid | Comparison          | Long ON in NMOSD                                                                                                                                    |
| Cai et al 2016 (113)      | B/P | NMOSD                  | Case series         | LESCL; linear spinal cord in NMOSD                                                                                                                  |
| Fazekas et al 1988 (114)  | B/P | MS vs Healthy          | Comparison          | Large (> 6mm); periventricular; infratentorial in MS                                                                                                |
| Paty et al 1988 (23)      | B/P | MS vs CIS              | Comparison          | Paty criteria in MS                                                                                                                                 |
| Barkhof et al 1997 (24)   | B/P | MS vs CIS              | Comparison          | Gd-enhancing brain; juxtacortical; periventricular; infratentorial in MS                                                                            |
| Bakshi et al 1998 (115)   | B/P | TM vs MS               | Comparison          | Short segment cord, partial spinal cord in MS                                                                                                       |
| Tintore et al 2000 (116)  | B/P | MS vs CIS              | Case series         | Paty; Fazekas; Barkhof in MS                                                                                                                        |
| Korteweg et al 2006 (117) | B/P | MS vs CIS              | Comparison          | Barkhof/Tintore criteria in MS                                                                                                                      |
| Tintore et al 2006 (118)  | B/P | MS vs CIS              | Comparison          | Barkhof; >9 lesions in MS                                                                                                                           |
| Swanton et al 2007 (31)   | B/P | MS vs CIS              | Comparison          | Juxtacortical; periventricular; infratentorial; spinal cord; new T2 in MS                                                                           |
| Polman et al 2011 (19)    | B/P | MS                     | Diagnostic Criteria | Periventricular; juxtacortical; infratentorial; spinal cord; new T2; new Gd in MS                                                                   |
| Ruet et al 2011 (119)     | B/P | TM vs MS               | Comparison          | >1 spinal cord; partial spinal cord; >8 brain; >2 periventricular in MS                                                                             |
| Bourre et al 2012 (120)   | B/P | TM vs MS               | Comparison          | Abnormal MR brain; Barkhof criteria; partial spinal cord; Gd spinal cord in MS                                                                      |

LS = literature search; B/P = bibliographic search or personal knowledge; ADEM = acute disseminated encephalomyelitis; IDDD = idiopathic disseminated demyelinating disease; MS = multiple sclerosis; NMOSD = neuromyelitis optica spectrum disorder; AQP4 = aquaporin 4 antibody; +ve = positive; -ve = negative; ON = optic neuritis; ATM = acute transverse myelitis; LETM = longitudinally extensive transverse myelitis; TM = transverse myelitis; LESCL = longitudinally extensive spinal cord lesion; CST = corticospinal tract; CIS = clinically isolated syndrome; PRES = posterior reversible encephalopathy syndrome.
