# Supplementary material for: MRI Patterns Distinguish AQP4 Antibody Positive Neuromyelitis Optica Spectrum Disorder From Multiple Sclerosis
Source: PubMed Central journal article supplement (PMC8458658; doi:10.3389/fneur.2021.722237), 2021-09-09
Supplement: Table_2.pdf [file Table_2.pdf]

Supplementary Table 2. Frequencies, sensitivity, specificity and odds ratios for lesions in NMOSD and MS

| Lesion                                                             | NMOSD             |              |              | MS                |              |              | OR (95% CI)                       |
|--------------------------------------------------------------------|-------------------|--------------|--------------|-------------------|--------------|--------------|-----------------------------------|
|                                                                    | Frequency         | Sensitivity  | Specificity  | Frequency         | Sensitivity  | Specificity  |                                   |
|                                                                    | n/N (%)           |              |              | n/N (%)           |              |              |                                   |
| <b>Longitudinally Extensive Spinal Cord T2 Lesion (NMOSD)</b>      | <b>43/61 (70)</b> | <b>0.705</b> | <b>0.988</b> | <b>1/86 (1)</b>   | <b>0.012</b> | <b>0.295</b> | <b>203.056 (26.223 - 1572.34)</b> |
| <b>Bright Spotty Spinal Cord T2 Lesion (NMOSD)</b>                 | <b>32/61 (52)</b> | <b>0.525</b> | <b>0.988</b> | <b>1/86 (1)</b>   | <b>0.012</b> | <b>0.475</b> | <b>93.793 (12.263 - 717.392)</b>  |
| <b>Whole (Axial) Spinal Cord T2 Lesion (NMOSD)</b>                 | <b>15/61 (25)</b> | <b>0.250</b> | <b>0.994</b> | <b>0/86 (0)</b>   | <b>0.006</b> | <b>0.750</b> | <b>57.667 (3.374 - 985.702)</b>   |
| <b>Bilateral Optic Nerve T2 or Gd-enhancing T1 Lesions (NMOSD)</b> | <b>8/62 (13)</b>  | <b>0.135</b> | <b>0.995</b> | <b>0/100 (0)</b>  | <b>0.005</b> | <b>0.865</b> | <b>31.349 (1.775 - 553.567)</b>   |
| <b>Gd-enhancing Spinal Cord T1 Lesion</b>                          | <b>17/55 (31)</b> | <b>0.309</b> | <b>0.985</b> | <b>1/65 (2)</b>   | <b>0.015</b> | <b>0.691</b> | <b>28.632 (3.662 - 223.831)</b>   |
| <b>Nucleus Tractus Solitarius T2 Lesion (NMOSD)</b>                | <b>5/62 (9)</b>   | <b>0.087</b> | <b>0.995</b> | <b>0/100 (0)</b>  | <b>0.005</b> | <b>0.913</b> | <b>19.226 (1.044 - 354.059)</b>   |
| Leptomeningeal Gd-enhancing T1 Lesion (NMOSD)                      | 4/52 (8)          | 0.085        | 0.995        | 0/100 (0)         | 0.005        | 0.915        | 18.649 (0.984 - 353.414)          |
| <b>Periaqueductal T2 Lesion (NMOSD)</b>                            | <b>9/62 (15)</b>  | <b>0.145</b> | <b>0.990</b> | <b>1/100 (1)</b>  | <b>0.010</b> | <b>0.855</b> | <b>16.811 (2.074 - 136.297)</b>   |
| Optic Chiasm T2 or Gd-enhancing T1 Lesion (NMOSD)                  | 4/62 (7)          | 0.071        | 0.995        | 0/100 (0)         | 0.005        | 0.929        | 15.462 (0.818 - 292.328)          |
| Central Medullary T2 Lesion (NMOSD)                                | 4/62 (7)          | 0.071        | 0.995        | 0/100 (0)         | 0.005        | 0.929        | 15.462 (0.818 - 292.328)          |
| <b>Optic Nerve Gd-enhancing T1 Lesion</b>                          | <b>7/52 (13)</b>  | <b>0.135</b> | <b>0.990</b> | <b>1/100 (1)</b>  | <b>0.010</b> | <b>0.865</b> | <b>15.4 (1.84 - 128.911)</b>      |
| <b>Third Ventricular Periependymal T2 Lesion (NMOSD)</b>           | <b>7/62 (11)</b>  | <b>0.113</b> | <b>0.990</b> | <b>1/100 (1)</b>  | <b>0.010</b> | <b>0.887</b> | <b>12.6 (1.511 - 105.088)</b>     |
| <b>Spinal Cord Swelling (NMOSD)</b>                                | <b>13/61 (21)</b> | <b>0.213</b> | <b>0.977</b> | <b>2/86 (2)</b>   | <b>0.023</b> | <b>0.787</b> | <b>11.375 (2.462 - 52.552)</b>    |
| Cloud-like Gd-enhancing T1 Lesion (NMOSD)                          | 2/52 (5)          | 0.047        | 0.995        | 0/100 (0)         | 0.005        | 0.953        | 9.95 (0.469 - 211.2)              |
| <b>Central Spinal Cord T2 Lesion (NMOSD)</b>                       | <b>43/58 (74)</b> | <b>0.741</b> | <b>0.772</b> | <b>18/79 (23)</b> | <b>0.228</b> | <b>0.259</b> | <b>9.715 (4.415 - 21.375)</b>     |
| <b>Optic Nerve T2 Lesion</b>                                       | <b>20/62 (32)</b> | <b>0.323</b> | <b>0.950</b> | <b>5/100 (5)</b>  | <b>0.050</b> | <b>0.677</b> | <b>9.048 (3.182 - 25.729)</b>     |
| Area Postrema T2 Lesion (NMOSD)                                    | 2/62 (4)          | 0.040        | 0.995        | 0/100 (0)         | 0.005        | 0.960        | 8.306 (0.392 - 175.928)           |

|                                                        |                   |              |              |                  |              |              |                               |
|--------------------------------------------------------|-------------------|--------------|--------------|------------------|--------------|--------------|-------------------------------|
| <b>Hypothalamic T2 Lesion (NMOSD)</b>                  | <b>8/62 (13)</b>  | <b>0.129</b> | <b>0.980</b> | <b>2/100 (2)</b> | <b>0.020</b> | <b>0.871</b> | <b>7.259 (1.488 - 35.41)</b>  |
| <b>Initial Brain MRI Normal (NMOSD)</b>                | <b>10/62 (16)</b> | <b>0.161</b> | <b>0.970</b> | <b>3/100 (3)</b> | <b>0.030</b> | <b>0.839</b> | <b>6.218 (1.639 - 23.592)</b> |
| <b>Spinal Cord Atrophy (NMOSD)</b>                     | <b>12/61 (20)</b> | <b>0.197</b> | <b>0.953</b> | <b>4/86 (5)</b>  | <b>0.047</b> | <b>0.803</b> | <b>5.02 (1.534 - 16.431)</b>  |
| Longitudinal Corticospinal Tract T2 Lesion (NMOSD)     | 1/62 (2)          | 0.024        | 0.995        | 0/100 (0)        | 0.005        | 0.976        | 4.902 (0.197 - 122.253)       |
| Longitudinal T2 Optic Nerve Lesion (NMOSD)             | 1/62 (2)          | 0.024        | 0.995        | 0/100 (0)        | 0.005        | 0.976        | 4.902 (0.197 - 122.253)       |
| Cystic Brain Lesion (NMOSD)                            | 3/62 (5)          | 0.048        | 0.980        | 2/100 (2)        | 0.020        | 0.952        | 2.492 (0.404 - 15.349)        |
| Cerebellar Gd-enhancing T1 Lesion                      | 1/52 (2)          | 0.019        | 0.990        | 1/100 (1)        | 0.010        | 0.981        | 1.941 (0.119 - 31.679)        |
| Patch White Matter T2 Lesion (NMOSD)                   | 33/62 (53)        | 0.532        | 0.620        | 38/100 (38)      | 0.380        | 0.468        | 1.857 (0.977 - 3.527)         |
| Tumefactive Brain T2 Lesion (NMOSD)                    | 1/62 (2)          | 0.016        | 0.990        | 1/100 (1)        | 0.010        | 0.984        | 1.623 (0.1 - 26.427)          |
| Subcortical Gd-enhancing T1 Lesion                     | 3/52 (6)          | 0.058        | 0.950        | 5/100 (5)        | 0.050        | 0.942        | 1.163 (0.267 - 5.071)         |
| Bridging Splenium T2 Lesion (NMOSD)                    | 2/62 (3)          | 0.032        | 0.970        | 3/100 (3)        | 0.030        | 0.968        | 1.078 (0.175 - 6.638)         |
| Brainstem Periependymal T2 Lesion (NMOSD)              | 2/62 (3)          | 0.032        | 0.970        | 3/100 (3)        | 0.030        | 0.968        | 1.078 (0.175 - 6.638)         |
| Linear Periventricular Periependymal T2 Lesion (NMOSD) | 8/62 (13)         | 0.129        | 0.860        | 14/100 (14)      | 0.140        | 0.871        | 0.91 (0.358 - 2.313)          |
| Brainstem T2 Lesion (MS)                               | 13/62 (21)        | 0.210        | 0.770        | 23/100 (23)      | 0.230        | 0.790        | 0.888 (0.412 - 1.916)         |
| Rounded Corpus Callosum T2 Lesion                      | 1/62 (2)          | 0.016        | 0.980        | 2/100 (2)        | 0.020        | 0.984        | 0.803 (0.071 - 9.049)         |
| Heterogeneous Corpus Callosum T2 Lesion (NMOSD)        | 3/62 (5)          | 0.048        | 0.940        | 6/100 (6)        | 0.060        | 0.952        | 0.797 (0.192 - 3.308)         |
| Large Infratentorial T2 Lesion                         | 8/62 (13)         | 0.129        | 0.840        | 16/100 (16)      | 0.160        | 0.871        | 0.778 (0.312 - 1.942)         |
| Pencil-like Callosum T2 Lesion (NMOSD)                 | 8/62 (13)         | 0.129        | 0.840        | 16/100 (16)      | 0.160        | 0.871        | 0.778 (0.312 - 1.942)         |
| Punctate White Matter T2 Lesion (NMOSD)                | 10/62 (16)        | 0.161        | 0.800        | 20/100 (20)      | 0.200        | 0.839        | 0.769 (0.334 - 1.774)         |
| Cerebral Peduncle T2 Lesion (NMOSD)                    | 8/62 (13)         | 0.129        | 0.830        | 17/100 (17)      | 0.170        | 0.871        | 0.723 (0.292 - 1.792)         |
| Thalamic T2 Lesion                                     | 2/62 (3)          | 0.032        | 0.950        | 5/100 (5)        | 0.050        | 0.968        | 0.633 (0.119 - 3.369)         |

|                                                      |                   |              |              |                    |              |              |                              |
|------------------------------------------------------|-------------------|--------------|--------------|--------------------|--------------|--------------|------------------------------|
| Cerebellar Peduncle Gd-enhancing T1 Lesion           | 0/52 (0)          | 0.009        | 0.985        | 1/100 (1)          | 0.015        | 0.991        | 0.632 (0.025 - 15.781)       |
| Corpus Callosum Gd-enhancing T1 Lesion               | 0/52 (0)          | 0.009        | 0.985        | 1/100 (1)          | 0.015        | 0.991        | 0.632 (0.025 - 15.781)       |
| Deep Grey Matter T2 Lesion                           | 7/62 (11)         | 0.113        | 0.810        | 19/100 (19)        | 0.190        | 0.887        | 0.543 (0.214 - 1.378)        |
| <b>Partial Spinal Cord T2 Lesion (MS)</b>            | <b>29/58 (50)</b> | <b>0.500</b> | <b>0.316</b> | <b>54/79 (68)</b>  | <b>0.684</b> | <b>0.500</b> | <b>0.463 (0.23 - 0.932)</b>  |
| Cerebellar Peduncle T2 Lesion (MS)                   | 8/62 (13)         | 0.129        | 0.740        | 26/100 (26)        | 0.260        | 0.871        | 0.422 (0.177 - 1.003)        |
| <b>Short Spinal Cord T2 Lesion (MS)</b>              | <b>29/61 (48)</b> | <b>0.475</b> | <b>0.291</b> | <b>61/86 (71)</b>  | <b>0.709</b> | <b>0.525</b> | <b>0.371 (0.187 - 0.737)</b> |
| <b>Juxtacortical T2 Lesion (MS)</b>                  | <b>35/62 (56)</b> | <b>0.565</b> | <b>0.220</b> | <b>78/100 (78)</b> | <b>0.780</b> | <b>0.435</b> | <b>0.366 (0.183 - 0.729)</b> |
| <b>Subcortical T2 Lesion</b>                         | <b>37/62 (60)</b> | <b>0.597</b> | <b>0.190</b> | <b>81/100 (81)</b> | <b>0.810</b> | <b>0.403</b> | <b>0.347 (0.17 - 0.708)</b>  |
| <b>Cortical T2 Lesion</b>                            | <b>15/62 (24)</b> | <b>0.242</b> | <b>0.510</b> | <b>49/100 (49)</b> | <b>0.490</b> | <b>0.758</b> | <b>0.332 (0.165 - 0.67)</b>  |
| Any Brain Gd-enhancing T1 Lesion                     | 3/52 (6)          | 0.058        | 0.830        | 17/100 (17)        | 0.170        | 0.942        | 0.299 (0.083 - 1.072)        |
| <b>Large T2 Brain Lesion (MS)</b>                    | <b>27/62 (44)</b> | <b>0.435</b> | <b>0.270</b> | <b>73/100 (73)</b> | <b>0.730</b> | <b>0.565</b> | <b>0.285 (0.146 - 0.557)</b> |
| <b>Large Supratentorial T2 Lesion</b>                | <b>24/62 (39)</b> | <b>0.387</b> | <b>0.290</b> | <b>71/100 (71)</b> | <b>0.710</b> | <b>0.613</b> | <b>0.258 (0.132 - 0.504)</b> |
| <b>Cerebellar T2 Lesion (MS)</b>                     | <b>4/62 (6)</b>   | <b>0.065</b> | <b>0.760</b> | <b>24/100 (24)</b> | <b>0.240</b> | <b>0.935</b> | <b>0.218 (0.072 - 0.664)</b> |
| <b>Initial MRI Brain Meets Barkhof Criteria (MS)</b> | <b>15/62 (24)</b> | <b>0.242</b> | <b>0.400</b> | <b>60/100 (60)</b> | <b>0.600</b> | <b>0.758</b> | <b>0.213 (0.105 - 0.431)</b> |
| <b>Inferior Temporal Lobe T2 Lesion (MS)</b>         | <b>6/62 (10)</b>  | <b>0.097</b> | <b>0.650</b> | <b>35/100 (35)</b> | <b>0.350</b> | <b>0.903</b> | <b>0.199 (0.078 - 0.508)</b> |
| <b>New Brain T2 Lesion (MS)</b>                      | <b>13/62 (21)</b> | <b>0.210</b> | <b>0.420</b> | <b>58/100 (58)</b> | <b>0.580</b> | <b>0.790</b> | <b>0.192 (0.093 - 0.398)</b> |
| <b>Splenium T2 Lesion</b>                            | <b>2/62 (3)</b>   | <b>0.032</b> | <b>0.850</b> | <b>15/100 (15)</b> | <b>0.150</b> | <b>0.968</b> | <b>0.189 (0.042 - 0.857)</b> |
| <b>Any Corpus Callosum T2 Lesion</b>                 | <b>8/62 (13)</b>  | <b>0.129</b> | <b>0.550</b> | <b>45/100 (45)</b> | <b>0.450</b> | <b>0.871</b> | <b>0.181 (0.078 - 0.42)</b>  |
| <b>Hypodense T1 Brain Lesion (Black Hole)</b>        | <b>6/62 (10)</b>  | <b>0.097</b> | <b>0.590</b> | <b>41/100 (41)</b> | <b>0.410</b> | <b>0.903</b> | <b>0.154 (0.061 - 0.391)</b> |
| New Brain Gd-enhancing T1 Lesion (MS)                | 0/52 (0)          | 0.009        | 0.936        | 6/100 (6)          | 0.064        | 0.991        | 0.138 (0.008 - 2.507)        |
| <b>Any Temporal Lobe T2 Lesion</b>                   | <b>8/62 (13)</b>  | <b>0.129</b> | <b>0.480</b> | <b>52/100 (52)</b> | <b>0.520</b> | <b>0.871</b> | <b>0.137 (0.059 - 0.317)</b> |

|                                                   |                   |              |              |                    |              |              |                              |
|---------------------------------------------------|-------------------|--------------|--------------|--------------------|--------------|--------------|------------------------------|
| <b>Periventricular T2 Lesion (MS)</b>             | <b>27/62 (44)</b> | <b>0.435</b> | <b>0.150</b> | <b>85/100 (85)</b> | <b>0.850</b> | <b>0.565</b> | <b>0.136 (0.065 - 0.286)</b> |
| <b>Initial MRI Brain Meets Paty Criteria (MS)</b> | <b>37/62 (60)</b> | <b>0.597</b> | <b>0.080</b> | <b>92/100 (92)</b> | <b>0.920</b> | <b>0.403</b> | <b>0.129 (0.053 - 0.311)</b> |
| Juxtacortical Gd-enhancing T1 Lesion              | 0/52 (0)          | 0.009        | 0.926        | 7/100 (7)          | 0.074        | 0.991        | 0.119 (0.007 - 2.121)        |
| <b>Other Corpus Callosum T2 Lesion</b>            | <b>1/62 (2)</b>   | <b>0.016</b> | <b>0.860</b> | <b>14/100 (14)</b> | <b>0.140</b> | <b>0.984</b> | <b>0.101 (0.013 - 0.786)</b> |
| Periventricular Gd-enhancing T1 Lesion            | 0/52 (0)          | 0.009        | 0.896        | 10/100 (10)        | 0.104        | 0.991        | 0.082 (0.005 - 1.43)         |
| <b>Pyramidal Corpus Callosum T2 Lesion (MS)</b>   | <b>1/62 (2)</b>   | <b>0.016</b> | <b>0.780</b> | <b>22/100 (22)</b> | <b>0.220</b> | <b>0.984</b> | <b>0.058 (0.008 - 0.443)</b> |
| <b>Dawson's Finger T2 Lesion (MS)</b>             | <b>0/62 (0)</b>   | <b>0.008</b> | <b>0.797</b> | <b>20/100 (20)</b> | <b>0.203</b> | <b>0.992</b> | <b>0.031 (0.002 - 0.53)</b>  |
| <b>Ovoid T2 Lesion (MS)</b>                       | <b>1/62 (2)</b>   | <b>0.016</b> | <b>0.640</b> | <b>36/100 (36)</b> | <b>0.360</b> | <b>0.984</b> | <b>0.029 (0.004 - 0.219)</b> |

Entries in **bold** were significantly different

NMOSD = neuromyelitis optica; MS = multiple sclerosis; Gd = gadolinium, OR = odds ratios; CI = confidence interval
